# Supplementary material for: RhoA signaling increases mitophagy and protects cardiomyocytes against ischemia by stabilizing PINK1 protein and recruiting Parkin to mitochondria
Source: Springer Nature journal article supplement (doi:10.1038/s41418-022-01032-w), 2022-06-27
Supplement: MOESM1 [file 41418_2022_1032_MOESM1_ESM.pdf]

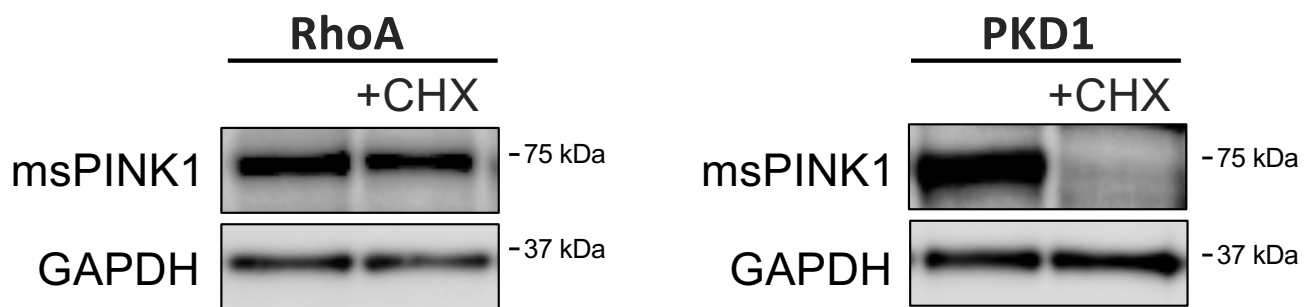

**Supplementary Figure 1. PKD1 overexpression does not inhibit msPINK1 degradation.** RhoA or PKD-1 were co-expressed with msPINK1 for 16 hrs, and then treated with cycloheximide (100  $\mu$ g/ml) for 30 min. Whole cell lysates were subjected to WB for PINK1 (msPINK1) and GAPDH (loading control).
